## PHA-induced cell proliferation rescues human peripheral blood lymphocytes from X-ray-induced apoptosis

M.Carloni<sup>1</sup>, R.Meschini<sup>1</sup>, L.Ovidi and F.Palitti<sup>2</sup>

Dipartimento di Agrobiologia e Agrochimica, Università degli Studi della Tuscia, Via San Camillo De Lellis, 01100 Viterbo, Italy

**Human peripheral blood G<sub>0</sub> lymphocytes were X-irradiated and allowed to recover for different periods both in the presence and absence of phytohemagglutinin (PHA). For each experimental condition the induction of apoptosis was investigated by nuclear morphology and formation of both DNA laddering and high molecular weight DNA fragments by pulsed field gel electrophoresis. The results showed that PHA cell growth stimulation could rescue peripheral blood lymphocytes (PBLs) from X-ray-induced apoptotic cell death. Instead, most X-irradiated lymphocytes held in G<sub>0</sub> phase, once they were committed to apoptosis, inexorably executed the process. These data indicate that the proliferative status of PBLs can influence apoptotic cell death: PHA-stimulated PBLs appear to be more radioresistant as a result of a less efficient apoptotic process. Therefore, in current tests for mutagenicity or cytotoxicity and in biodosimetric studies the possible role of apoptosis has to be considered.**

### Introduction

The ability of cells to maintain genome integrity is critical to ensure the long-term survival of the individual. Repair, growth arrest and cell suicide through apoptosis are therefore all possible strategies in response to DNA damage, although each different event will depend on cell type, location, environment and extent of damage.

Apoptosis may be the prudent option in heavily damaged cells that retain substantial replicative potential and therefore constitute a neoplastic risk. Investigation of the factors regulating the apoptotic cell death programme is important both to optimize cancer therapy and to design strategies to improve therapeutic outcomes. Furthermore, the role of apoptosis has to be taken into account to correctly evaluate the DNA damage induced by cell exposure to physical and chemical agents. The outcome of genotoxic damage in cells that are resistant to apoptosis will be entirely different from that in cells that are prone to apoptosis.

Apoptosis is a controlled form of cell death characterized by early morphological signs of chromatin condensation and fragmentation, followed by membrane blebbing and formation of apoptotic bodies (Kerr *et al.*, 1972; Wyllie *et al.*, 1980; Khodarev *et al.*, 1998). At the biochemical level, the apoptotic process is characterized by a number of different events, including intense nucleolytic activity (McConkey *et al.*, 1990; Salvesen and Dixit, 1997; Masato *et al.*, 1998; Thornberry and Lazebnik, 1998), yielding internucleosomal DNA fragments of 180–200 bp which form a peculiar ladder pattern when

separated by conventional agarose gel electrophoresis (Zhivotovsky *et al.*, 1994). This event is temporally and hierarchically preceded by the so-called large scale DNA cleavage that leads to formation of 50–300 kb DNA fragments that can only be detected by pulsed field gel electrophoresis (PFGE) (Filipski *et al.*, 1990; Cohen *et al.*, 1994; Walker *et al.*, 1994). Since it is still unclear which type of DNA fragmentation is the best marker of apoptosis (Oberhammer *et al.*, 1993a,b; Falcieri *et al.*, 1993), DNA degradation remains a good indicator of apoptosis when combined with morphological characterization.

Ionizing radiation is known to induce a variety of DNA lesions. DNA double-strand breaks (DSB) are considered to be the major DNA lesion, which if not repaired or mis-repaired is most likely to lead to cell death (Iliakis, 1991). Thus, DSB should play an important role in radiation-induced apoptosis and in radiation sensitivity (Radford, 1991; Warters, 1992; Olive, 1998); accordingly, cells defective in repair of DSB are sensitive to ionizing radiation (Zdzienicka, 1995).

Radiobiologists often distinguish between radiation-induced cell death with regard to the ability to enter mitosis, i.e. interphase or mitotic cell death. Interphase cell death occurs before entry of the cells into the next division and also occurs in non-cycling cells (Umansky *et al.*, 1981; Yamada and Ohyama, 1988; Shinohara and Nakano, 1993), while mitotic cell death occurs one or even several divisions after irradiation and is characteristic of actively proliferating cells (Radford and Murphy, 1994; Radford *et al.*, 1994). Interphase and mitotic cell death were both shown to involve apoptosis (Tsuchi and Sawada, 1994).

It has long been known that culture conditions, cell cycle position and differentiation stage can influence human lymphocyte sensitivity to radiation-induced cell death and, in particular, addition of mitogens can enhance the radioresistance of these cells (Lowenthal and Harris, 1985; Stewart *et al.*, 1988). Some authors have shown that mitogen-stimulated cells immediately after irradiation have a higher frequency of chromosome aberrations than cells resting in G<sub>0</sub> phase before addition of mitogens (Santos Mello *et al.*, 1974) and data in the literature report that radiation-induced cell death was reduced by mitogens (Schrek and Stefani, 1964; Sato, 1970; Meijer *et al.*, 1999). A mechanistic explanation is given by Holmstrom *et al.* (1998), who showed that elevation by PHA of the mitogen-activated protein kinase (MAPK) cascade is a negative regulator of Fas-mediated apoptosis.

The present study has the aim of investigating whether X-ray-induced apoptosis is modified during the process of phytohemagglutinin (PHA)-induced cell proliferation, comparing the extent and kinetics of apoptotic DNA fragmentation during apoptotic cell death in quiescent and proliferating human peripheral blood lymphocytes (PBLs). These cells represent the most common tissue for biological dosimetry

<sup>1</sup>These two authors contributed equally to this work.

<sup>2</sup>To whom correspondence should be addressed. Tel: +39 0761 357206; Fax: +39 0761 357242; Email: palitti@unitus.it

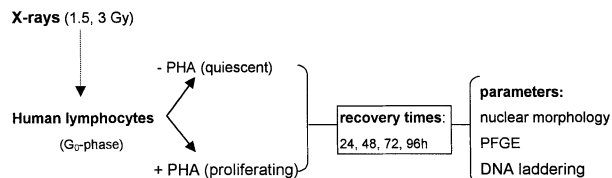

**Fig. 1.** Experimental scheme.  $G_0$  lymphocytes, isolated from fresh peripheral blood, were exposed to 1.5 or 3 Gy X-rays and allowed to recover for different periods either in the presence or absence of PHA. For each experimental condition the nuclear morphology and the formation of both DNA laddering and HMW DNA fragments were analysed.

studies, therefore, among other factors, induction of apoptosis could negatively affect estimation of radiation exposure both *in vitro* after PBL stimulation and after *in vivo* exposure, where most cells are quiescent.

## Materials and methods

### Preparation of cells

Lymphocytes were obtained from blood banks and peripheral blood mononuclear cells were isolated by separation in Histopaque 1077 (Sigma) from freshly collected buffy coats. Diluted blood was carefully layered onto the Histopaque 1077 and centrifuged at 400 g for 30 min. After centrifugation the opaque interface containing mononuclear cells was collected and washed with phosphate-buffered saline (PBS). To reach the high number of cells needed to perform the experiment, isolated lymphocytes from two or three donors were pooled. After isolation, lymphocytes were seeded at a cell density of  $1 \times 10^6$  cells/ml in Ham's F10 medium (Bio-Whittaker), 2 mM L-glutamine, 50 U/ml penicillin, 50  $\mu$ g/ml streptomycin and 20% heat-inactivated fetal calf serum (Bio-Whittaker) and incubated at 37°C in a 5%  $CO_2$  atmosphere at 80% humidity.

### Irradiation procedure and experimental protocol

The experimental protocol is shown in Figure 1.  $G_0$  lymphocytes were X-irradiated at 37°C with a 250 kV and 6 mA Gilardoni MGL200/8D X-ray apparatus, at a dose rate of 60 cGy/min. Cells were exposed in complete medium without PHA (Wellcome) to 1.5 and 3 Gy. Immediately after irradiation half of the cell cultures were resuspended in growth medium supplemented with 2% PHA to induce cell proliferation and the other half were kept in medium without PHA. Then the cells were allowed to recover for periods of 24, 48, 72 and 96 h and for each experimental condition the nuclear morphology, the formation of DNA laddering by conventional agarose gel electrophoresis and high molecular weight (HMW) DNA degradation were analysed by PFGE. The experiment was repeated three times.

### Analysis of nuclear morphology

For morphological analysis  $3\text{--}5 \times 10^5$  cells were fixed in 4% paraformaldehyde. Cells were then seeded on a gelatinized slide, stained with 0.1% Mayers hematoxylin (Sigma) and analysed by optical microscopy. Apoptosis was quantified by scoring cells with condensed and fragmented nuclei. In random selected fields 500 cells from PBLs from three donors were scored at a magnification of 1000 $\times$ . For each experimental condition the data were evaluated statistically by the  $\chi^2$  test.

### Conventional agarose gel electrophoresis

To analyse internucleosomal DNA fragmentation,  $2.5 \times 10^6$  lymphocytes were processed as described by Zhivotovsky *et al.* (1993) with minor modifications. The cell suspensions were mixed with an equal volume of ice-cold lysis buffer (10 mM Tris-HCl, pH 8.0, 20 mM EDTA, 0.5% Triton X-100) and incubated at 4°C for 20 min. The resulting suspension was centrifuged at 12 000 r.p.m. for 15 min to separate cell debris containing intact chromatin (pellet) from DNA fragments (supernatant). The DNA from supernatant was ethanol precipitated followed by RNA digestion with RNase A (200  $\mu$ g/ml) (Sigma) and subsequently incubated with proteinase K (100  $\mu$ g/ml) (Sigma). DNA samples were loaded onto a 1.5% neutral agarose gel, subjected to electrophoresis (60 V for 1 h) in  $1 \times$  TAE buffer (40 mM Tris-acetate, 10 mM EDTA) and photographed using Polaroid 667 positive film under UV (312 nm) illumination.

### Pulsed field gel electrophoresis

Agarose plugs were prepared as previously described (Zhivotovsky *et al.*, 1994). Briefly,  $6 \times 10^5$  lymphocytes were resuspended in 50  $\mu$ l of a solution containing 0.15 M NaCl, 2 mM  $KH_2PO_4/KOH$ , pH 6.8, 1 mM EGTA and 5 mM  $MgCl_2$ . An equal volume of liquefied 1% low melting point agarose

was added to the cell suspension and the mixture was aliquoted into gel plug casting forms. The resulting agarose blocks were placed in lysis buffer (10 mM NaCl, 10 mM Tris-HCl, pH 9.5, 25 mM EDTA, 1% laurylsarcosine) supplemented with proteinase K (1 mg/ml) and incubated at 50°C for 24 h. The agarose blocks were then introduced onto a 1% agarose gel and contour clamped homogeneous electric field electrophoresis was performed using a Gel Navigator horizontal chamber and Pulsator 2015 controller (Pharmacia LKB). Total run time was 19 h at 180 V at 9°C in  $0.5 \times$  TBE (45 mM Tris, 1.25 mM EDTA, 45 mM boric acid, pH 8.0). Pulses applied were 180 s for 4 h, 90 s for 3 h, 45 s for 6 h and 20 s for 6 h. After the run the gel was stained with ethidium bromide (1  $\mu$ g/ml) (Sigma), visualized under a 312 nm light source and photographed using Polaroid 667 positive film.

## Results

The results presented in this work are representative of three repeated experiments, all showing the same trend and good reproducibility.

Figure 2 shows the data derived from nuclear morphology analysis of control and X-irradiated cells after recovery periods of 24, 48, 72 and 96 h, both in the presence and absence of PHA. In the control sample the yield of apoptotic cells was enhanced with time. In particular, in proliferating lymphocytes the apoptotic cell death percentage was higher and statistically significant at all sampling times except at 24 h, when compared with quiescent lymphocytes. In X-irradiated samples the nuclear morphology evaluation showed a higher induction of apoptosis after X-ray treatment in quiescent cells when compared with proliferating lymphocytes. In fact, apoptotic cell death decreased following direct exposure to medium containing PHA. The effect was statistically significant at recovery times of 48 and 72 h in 1.5 Gy X-irradiated lymphocytes, while in cells exposed to a higher dose (3 Gy) a significant difference in apoptosis induction was already evident at 24 h recovery time. When the nuclear morphology was analysed at 96 h after X-irradiation the incidence of apoptosis was the same in both proliferating and quiescent lymphocytes, as well as in proliferating control cells, when compared with X-irradiated ones.

Moreover, there was no cell death dose-response effect induced by X-rays in proliferating lymphocytes when compared with control cells, while it was present in quiescent ones.

The analysis performed by conventional agarose gel electrophoresis only detected 180–200 bp internucleosomal DNA fragments at 48 h recovery time in quiescent lymphocytes at both X-ray doses (Figure 3).

Figure 4 shows an example of the formation of HMW DNA fragments analysed by PFGE on the same cell cultures. In each agarose plug precisely the same number of cells was embedded and the repeated experiments showed good reproducibility. PFGE (Figure 4A) revealed DNA fragmentation only at the 72 and 96 h recovery times in control proliferating lymphocytes and no degradation at all in control quiescent cells. In quiescent X-ray-treated lymphocytes (Figure 4B) a progressive increase at later times of DNA fragments with a molecular size corresponding to 50 kb and their further cleavage to lower molecular weight fragments was detected. The PFGE results obtained with proliferating X-irradiated cells (Figure 4B) at the 48 and 72 h recovery times showed a decrease in the 50 kb fragments coupled with formation of HMW DNA with a more varying molecular size range than the typical 300 kb. The pattern of DNA degradation did not reveal qualitative differences between the two X-ray doses used. At the 96 h recovery time the control proliferating lymphocytes showed a HMW DNA fragmentation similar to proliferating X-ray-treated cells.

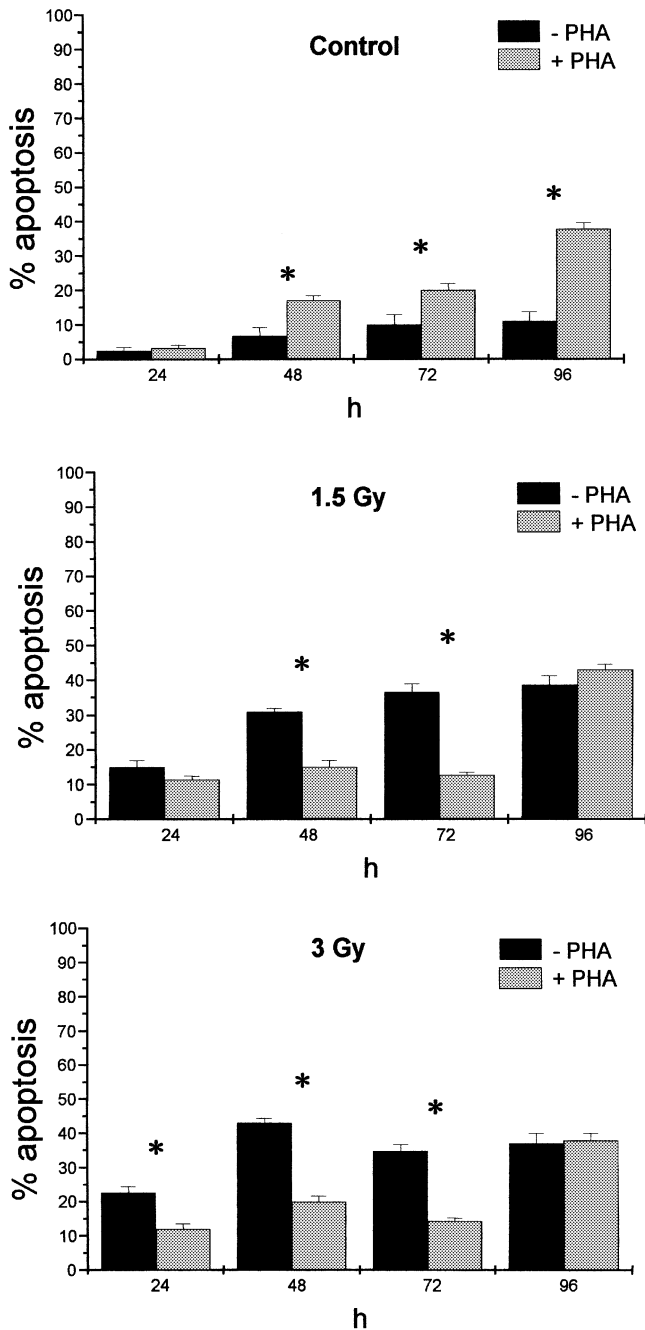

**Fig. 2.** Analysis of nuclear morphology. Percentage of apoptotic nuclei in proliferating (+PHA) and quiescent (-PHA) PBLs at different times of recovery after X-irradiation. Data points represent the means  $\pm$  SEM of three independent experiments unless otherwise indicated. \*, Values compared between the +PHA and -PHA PBLs are statistically significant ( $\chi^2$  test,  $P < 0.01$ ).

**Discussion**

The aim of this work was to investigate whether X-ray-induced apoptosis in human PBLs could be influenced by PHA-induced cell proliferation, with particular regard to DNA fragmentation.

X-ray-induced apoptosis was reduced in proliferating PBLs, where no cell death dose-response effect was observed, when compared with control cells (Figure 2). Possibly, apoptotic signals may not be generated by specific types or amounts of DNA lesions but could depend on the relative persistence of DNA damage (i.e. irreparable or slowly repaired DNA lesions)

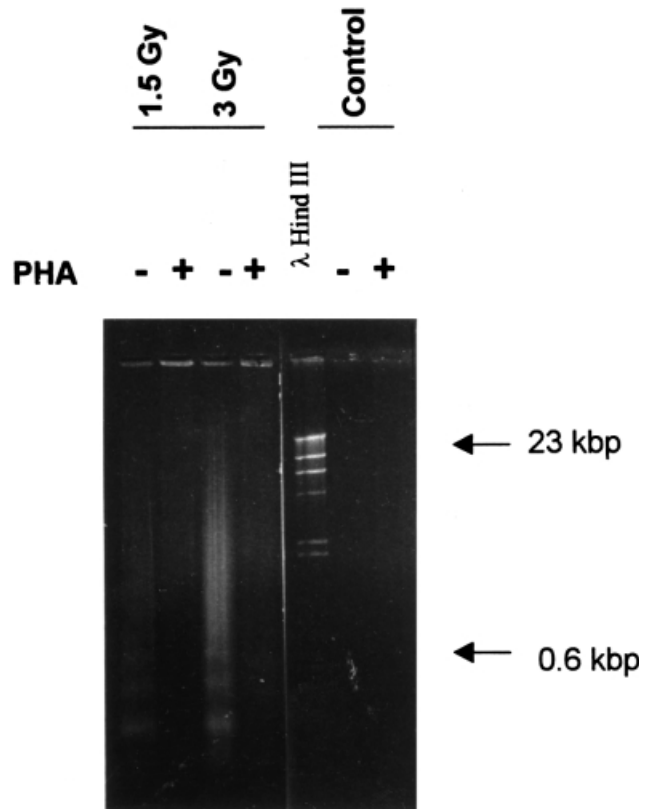

**Fig. 3.** Agarose gel electrophoresis. Internucleosomal DNA fragmentation (DNA laddering) in proliferating (+PHA) and quiescent (-PHA) PBLs at 48 h recovery after X-irradiation with 1.5 or 3 Gy. DNA size marker, *Hind*III-digested  $\lambda$  DNA. The photograph is an example of the results obtained in three repeated experiments showing good reproducibility and comparable outcomes.

(Cregan *et al.*, 1999). This hypothesis could explain the inexorable commitment to apoptosis of X-irradiated lymphocytes held in G<sub>0</sub> phase, as they probably carry persistent DNA lesions.

These conclusions are derived from the data obtained with the nuclear morphology and the DNA laddering analyses, both supporting the hypothesis that proliferating lymphocytes were rescued from cell death. In a recent paper Holmstrom *et al.* (1998) showed suppression of Fas/Apo-1-mediated apoptosis by MAPK signalling. This suggests that PHA-induced protection is most probably linked to PHA stimulation of an anti-apoptotic programme rather than to proliferation itself.

Previous work has already revealed such a mitogen protection effect, but only in terms of an increase in both cell viability and chromosomal aberrations (Harms-Ringdahl *et al.*, 1996; Holmberg *et al.*, 1998; Meijer *et al.*, 1999). The authors suggested that mitogen stimulation of irradiated cells may lead to increased survival at the expense of genomic fidelity and therefore gives rise to a conflict between growth stimulation and radiation-induced growth arrest.

In the present study these hypotheses are reinforced by the analysis of HMW DNA fragment degradation through PFGE. In fact, proliferating X-ray-treated lymphocytes showed HMW DNA fragmentation that did not completely reflect the typical apoptotic DNA degradation pattern and that could derive from DNA repair or mis-repair events, eventually giving rise to cytogenetic damage (Evans, 1977). Our PFGE data indicate that X-ray-induced DSBs involved in mis-repair events could

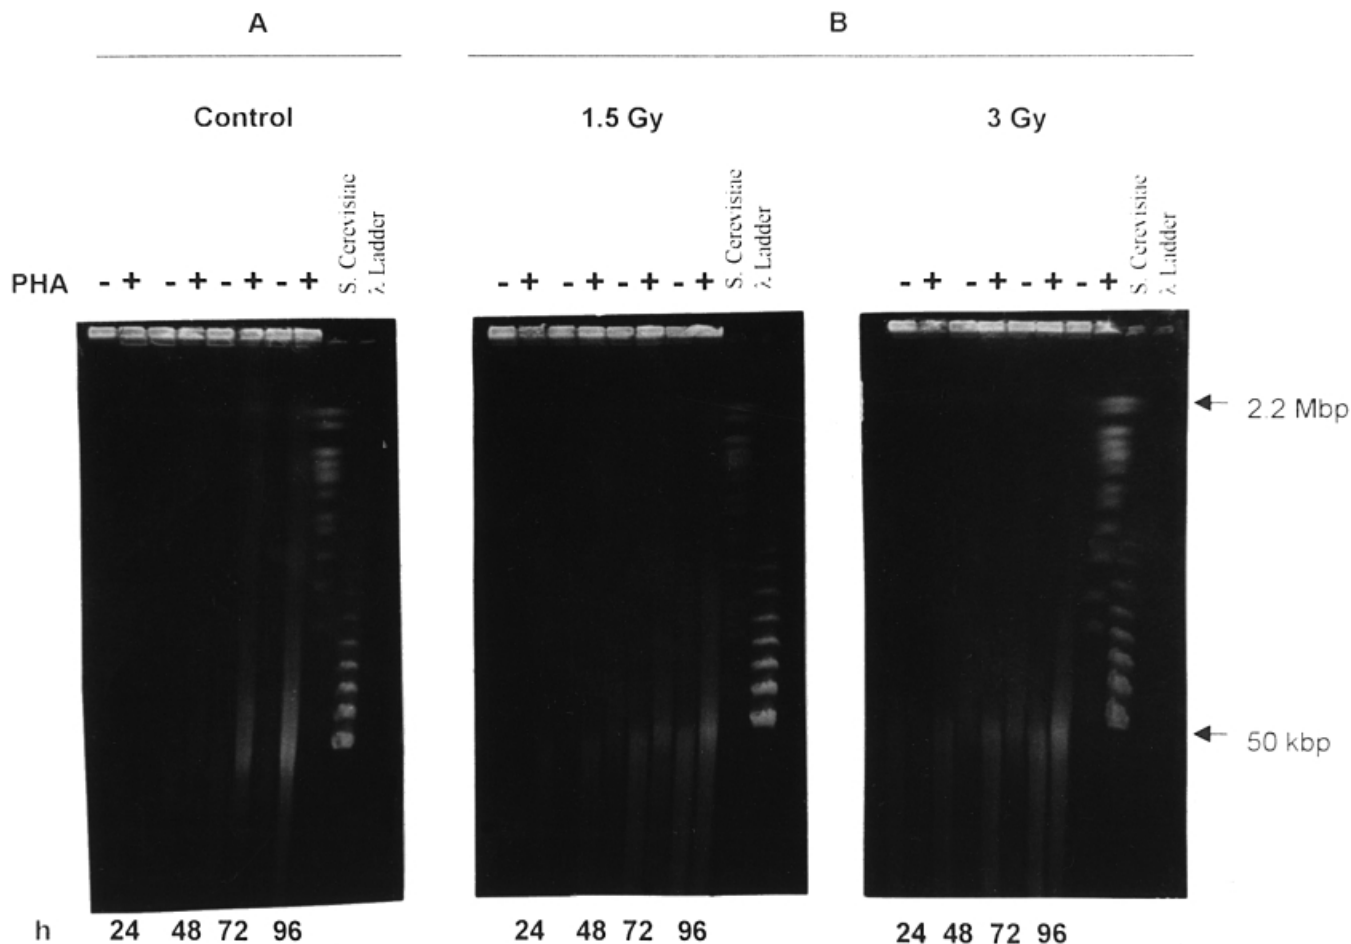

**Fig. 4.** PFGE. Formation of HMW DNA fragments in proliferating (+PHA) and quiescent (–PHA) PBLs at different recovery times after X-ray exposure. (A) Control. (B) X-ray-treated PBLs. DNA size markers, yeast chromosomes (2.2 Mb–0.225 kb) and λ ladder (50–1000 kb). The photographs are examples of the results of three repeated experiments showing good reproducibility and comparable outcomes.

resemblance in HMW DNA fragments corresponding to a more varied molecular size range than the 300 kb DNA degradation exclusive to the apoptotic process.

In contrast, in quiescent X-irradiated lymphocytes DNA degradation revealed the formation of fragments with a molecular size corresponding to 50 kb, the typical hallmark of apoptosis (Oberhammer *et al.*, 1993b), and their further cleavage to lower molecular weight DNA.

Moreover, proliferating treated lymphocytes and control stimulated cells showed similar PFGE DNA degradation patterns at the latest recovery times. The lack of difference in DNA fragmentation could derive from two distinct and independent events: on the one hand, processing of X-ray-induced DNA damage and, on the other, prolonged post-irradiation proliferating culture conditions itself producing DNA degradation. The last effect was clearly evident in the PFGE DNA fragmentation pattern of control proliferating lymphocytes. In agreement with this conclusion, in control stimulated lymphocytes apoptotic cell death was enhanced as recovery time increased, as usually observed in primary cell cultures which undergo the process of senescence and degeneration (Hayflick, 1965; Harman, 1991). Moreover, the mitogen protection effect was absent in irradiated cells at 96 h recovery time. In fact, DNA degradation analysis performed by conventional agarose gel electrophoresis no longer revealed

internucleosomal DNA cleavage but a smear (data not shown), probably due to secondary necrosis.

Nevertheless, the appearance of 180–200 bp internucleosomal DNA fragments does not seem to be a necessary event for execution of the apoptotic process since it can be cell type- or agent-specific (Marini *et al.*, 1996). In particular, our data indicated that PBLs did not show DNA laddering until they reached ~30–35% apoptotic morphological changes, as confirmed by other authors (Marini *et al.*, 1996). However, the application of PFGE to the study of apoptosis remains a more valid and informative parameter since it shows the formation of 50–300 kb DNA fragments as an invariant feature of early apoptotic stages, independent of the cell type and the apoptotic stimulus (Filipski *et al.*, 1990; Beere *et al.*, 1995). Furthermore, HMW DNA fragmentation precedes formation of apoptotic morphology, as demonstrated by time-course experiments (Oberhammer *et al.*, 1993b; Cohen *et al.*, 1994).

The overall results confirmed, at the biochemical level, how the culture conditions, in particular the presence of factors stimulating progression of the cell cycle, could increase human lymphocyte radioresistance in terms of a reduced rate of cell death. The proliferative status of the cells probably interferes with repair processes in terms of enhanced repair capability of proliferating cells when compared with the level of basal transcription of resting ones (Obe *et al.*, 1980; Obe and Beek,

1984). In this context, some DNA repair pathways have been demonstrated to be regulated as a function of cell proliferation and, in particular, increased DNA repair activity in stimulated PBLs irradiated with ionizing radiation has been described (Lavin and Kidson, 1977; MacWilliams *et al.*, 1983).

The data presented here indicate that a less efficient apoptotic process can cause radioresistance. Consequently, it is to be expected that cells carrying lesions would survive even if the risk of persistence of mutated cells and of proliferation of pre-cancer cells was increased.

Efficient execution of the apoptotic process could also affect the outcome of biological dosimetry studies since some circulating G<sub>0</sub> lymphocytes exposed to *in vivo* irradiation might be removed by this cell death mechanism. Thus, chromosomal aberration frequency could be affected in relation to the time lapse between exposure to the clastogenic agent and conventional PBL cytogenetic analysis. Therefore, the role of apoptosis has to be considered in current mutagenicity and cytotoxicity testing.

In general, a detailed knowledge on how the radiation-induced apoptotic process can be counteracted by proliferating agents (Berchem *et al.*, 1995; Wang and Hang, 1995; Kiess and Gallaher, 1998) may serve to give us a better understanding of the origin of intrinsic differences in radiosensitivity in terms of chromosomal aberrations and apoptosis, as well as to reveal the genetic control of the process. The possible anti-apoptotic action of agents in the environment may have a serious impact on the removal of cells with damaged and/or eroded genetic information.

## Acknowledgements

We gratefully thank B.Fazzini for photographic reproductions. This work was partially supported by EU contract no. FIGH-CT1999-00011.

## References

- Beere, H.M., Chresta, C.M., Alejo-Herberg, A., Skldanowchi, A., Dive, C., Larsen, A.K. and Hickman, J.A. (1995) Investigation of the mechanism of higher order chromatin fragmentation observed in drug-induced apoptosis. *Mol. Pharmacol.*, **47**, 986–996.
- Berchem, G.J., Bosseler, M., La Sugars, V.Y., Voeller, H.J., Zeitlin, S. and Gelmann, E.P. (1995) Androgens induce resistance to bcl-2-mediated apoptosis in LNCaP prostate cancer cells. *Cancer Res.*, **55**, 735–738.
- Cohen, G.M., Sun, X.M., Fernhead, H., MacFarlane, M., Brown, D.G., Snowden, R.T. and Dinsdale, D. (1994) Formation of large molecular weight fragments of DNA is a key committed step of apoptosis in thymocytes. *J. Immunol.*, **153**, 507–516.
- Cregan, S.P., Smith, B.P., Brown, D.L. and Mitchel, R.E.J. (1999) Two pathways for the induction of apoptosis in human lymphocytes. *Int. J. Radiat. Biol.*, **75**, 1069–1086.
- Evans, H.J. (1977) Molecular mechanisms in the induction of chromosome aberrations. In Scott, D., Sobels, F.H. and Bridges, B.A. (eds) *Progress in Genetic Toxicology*. North-Holland, Amsterdam, The Netherlands.
- Falcieri, E., Martelli, A.M., Bareggi, R., Cataldi, A. and Cocco, L. (1993) The protein kinase inhibitor staurosporine induces morphological changes typical of apoptosis in MOLT-4 cells without concomitant DNA fragmentation. *Biochem. Biophys. Res. Commun.*, **193**, 19–25.
- Filipski, J., Leblanc, J., Youdale, T., Sikorska, M. and Walker, P.R. (1990) Periodicity of DNA folding in higher order chromatin structure. *EMBO J.*, **9**, 1319–1327.
- Harman, D. (1991) The aging process: major risk factor for disease and death. *Proc. Natl Acad. Sci. USA*, **88**, 5360–5363.
- Harms-Ringdahl, M., Nicotera, P. and Radford, I.R. (1996) Radiation induced apoptosis. *Mutat. Res.*, **366**, 171–179.
- Hayflick, L. (1965) The limited *in vitro* lifetime of human diploid cell strains. *Exp. Cell Res.*, **37**, 614–636.
- Holmberg, K., Mejer, A.E., Harms-Ringdahl, M. and Lambert, B. (1998) Chromosomal instability in human lymphocytes after low dose rate  $\gamma$ -irradiation and delayed mitogen stimulation. *Int. J. Radiat. Biol.*, **73**, 21–34.
- Holmstrom, T.H., Chow, S.C., Elo, I., Coffey, E.T., Orrenius, S., Sistonen, L. and Eriksson, J.E. (1998) Suppression of Fas/APO-1-mediated apoptosis by mitogen-activated kinase signalling. *J. Immunol.*, **160**, 2626–2636.
- Iliakis, G. (1991) The role of DNA double-strand breaks in ionising radiation-induced killing of eukaryotic cells. *Bioessays*, **13**, 641–648.
- Kerr, J.F.R., Wyllie, A.H. and Currie, A.R. (1972) Apoptosis: a basic biological phenomenon with wide ranging implications in tissue kinetics. *Br. J. Cancer*, **26**, 239–257.
- Khodarev, N.N., Sokolova, I.A. and Vaughan, A.T.M. (1998) Mechanisms of induction of apoptotic DNA fragmentation. *Int. J. Radiat. Biol.*, **73**, 455–467.
- Kiess, W. and Gallaher, B. (1998) Hormonal control of programmed cell death/apoptosis. *Eur. J. Endocrinol.*, **138**, 482–491.
- Lavin, M.F. and Kidson, C. (1977) Repair of ionising radiation induced DNA damage in human lymphocytes. *Nucleic Acids Res.*, **4**, 4015–4022.
- Lowenthal, J.W. and Harris, A.W.J. (1985) Activation of mouse lymphocytes inhibits induction of rapid cell death by X-irradiation. *J. Immunol.*, **135**, 1119–1125.
- MacWilliams, R.S., Gross, W.G., Kaplan, J.G. and Birnboim, H.C. (1983) Repair rejoining of DNA strand breaks in resting human lymphocytes after irradiation by low doses of <sup>60</sup>Co  $\gamma$ -rays or 14.6-MeV neutrons. *Radiat. Res.*, **94**, 499–507.
- Marini, M., Musiani, D., Sesstili, P. and Cantoni, O. (1996) Apoptosis on human lymphocytes in the absence or presence of internucleosomal DNA cleavage. *Biochem. Biophys. Res. Commun.*, **229**, 910–915.
- Masato, E., Sakahira, H., Yokoyama, H., Okawa, K., Iwamatsu, A. and Nagata, S. (1998) A caspase-activated DNase death degrades DNA during apoptosis, and its inhibitor ICAD. *Nature*, **391**, 43–50.
- McConkey, D.J., Orrenius, S. and Jondal, M. (1990) Cellular signalling in programmed cell death (apoptosis). *Immunol. Today*, **11**, 120–121.
- Meijer, A.E., Sacidi, A.B., Zelenskaya, A., Czene, S., Granath, F. and Harms-Ringdahl, M. (1999) Influence of dose-rate, post-irradiation incubation time and growth factors on interphase cell death by apoptosis and clonogenic survival of human peripheral lymphocytes. *Int. J. Radiat. Biol.*, **75**, 1265–1273.
- Obe, G. and Beek, B. (1984) Human peripheral lymphocytes in mutation research. In Obe, G. (ed.), *Mutations in Man*. Springer-Verlag, Berlin, Germany, pp. 177–197.
- Obe, G., Natarajan, A.T. and Den Hertog, A. (1980) Studies on the influence of liquid holding in Con-A stimulated human peripheral blood lymphocytes on mitosis and X-ray induced chromosomal aberrations. *Hum. Genet.*, **54**, 385–390.
- Oberhammer, F., Fritsch, G., Schmied, M., Pavelka, M., Printz, D., Purchio, T., Lassman, H. and Schulte-Hermann, R. (1993a) Condensation of the chromatin at the membrane of an apoptotic nucleus is not associated with activation of an endonuclease. *J. Cell Sci.*, **104**, 317–326.
- Oberhammer, F., Wilson, J.W., Dive, C., Morris, I.D., Hickman, J.A., Wakeling, A.E., Walker, P.R. and Sikorska, M. (1993b) Apoptotic death in epithelial cells: cleavage of DNA to 300 and/or 50 kbp fragments prior to or in the absence of internucleosomal fragmentation. *EMBO J.*, **12**, 3679–3684.
- Olive, P.R. (1998) The role of DNA single- and double-strand breaks in cell killing by ionising radiation. *Radiat. Res.*, **150**, S42–S52.
- Radford, I.R. (1991) Mouse lymphoma cells that undergo interphase death show markedly increased sensitivity to radiation-induced DNA double-strand breakage as compared with cells that undergo mitotic death. *Int. J. Radiat. Biol.*, **59**, 1353–1369.
- Radford, I.R. and Murphy, T.K. (1994) Radiation response of mouse lymphoid and myeloid cell lines. Part III. Different signals can lead to apoptosis and may influence sensitivity to killing by DNA double-strand breakage. *Int. J. Radiat. Biol.*, **65**, 229–239.
- Radford, I.R., Murphy, T.K., Radley, J.M. and Ellis, S.L. (1994) Radiation response of mouse lymphoid and myeloid cell lines. Part II. Apoptotic death is shown by all lines examined. *Int. J. Radiat. Biol.*, **65**, 217–227.
- Salvesen, G.S. and Dixit, V.M. (1997) Caspases: intracellular signalling by proteolysis. *Cell*, **91**, 443–446.
- Santos Mello, R., Kwav, D. and Norman, A. (1974) Chromosome aberrations and T-cells survival in human lymphocytes. *Radiat. Res.*, **60**, 482–488.
- Sato, C. (1970) Change in the type of radiation cell killing on human lymphocytes after blast formation by phytohemagglutinin. *Int. J. Radiat. Biol.*, **18**, 483–485.
- Schrek, R. and Stefani, S. (1964) Radioresistance of phytohemagglutinin-treated normal and leukemic lymphocytes. *J. Natl Cancer Inst.*, **32**, 507–517.
- Shinohara, K. and Nakano, H. (1993) Interphase death and reproductive death in X-irradiated MOLT-4 cells. *Radiat. Res.*, **135**, 197–205.
- Stewart, C.C., Stevenson, A.P. and Habberset, R.C. (1988) The effect of low-dose irradiation on unstimulated and PHA-stimulated human lymphocyte subsets. *Int. J. Radiat. Biol.*, **53**, 77–87.

- Tauchi,H. and Sawada,S. (1994) Analysis of mitotic cell death caused by radiation in mouse leukemia L5178Y cells: apoptosis is the ultimate form of cell death following mitotic failure. *Int. J. Radiat. Biol.*, **65**, 449–455.
- Thornberry,N. and Lazebnik,Y. (1998) Caspases: enemies within. *Science*, **281**, 1312–1315.
- Umansky,S.R., Korol,B.A. and Nelipovich,P.A. (1981) *In vivo* DNA degradation in thymocytes of gamma-irradiated or hydrocortisone-treated rats. *Biochim. Biophys. Acta*, **665**, 9–17.
- Wang,T.T.Y. and Hang,J.M. (1995) Effects of estrogen on apoptotic pathways in human breast cancer cell line MCF-7. *Cancer Res.*, **55**, 2487–2489.
- Walker,P.R., Weaver,V.M., Lach,B., Leblanc,J. and Sisikorska,M. (1994) Endonuclease activities associated with high molecular weight and internucleosomal DNA fragmentation in apoptosis. *Exp. Cell Res.*, **213**, 100–106.
- Warters,R.L. (1992) Radiation-induced apoptosis in a murine T-cell hybridoma. *Cancer Res.*, **52**, 883–890.
- Wyllie,A.H., Kerr,J.F.R. and Currie,A.R. (1980) Cell death: the significance of apoptosis. *Int. Rev. Cytol.*, **68**, 251–306.
- Yamada,T. and Ohyama,H. (1988) Radiation-induced interphase death of rat thymocytes is internally programmed (apoptosis). *Int. J. Radiat. Biol.*, **53**, 65–75.
- Zdzienicka,M.Z. (1995) Mammalian mutants defective in the response to ionising radiation-induced DNA damage. *Mutat. Res.*, **336**, 203–213.
- Zhivotovsky,B., Nicotera,P., Bellomo,G., Hanson,K., Orrenius,S. (1993) Ca<sup>2+</sup> and endonuclease activation in radiation-induced lymphoid cell death. *Exp. Cell Res.*, **207**, 163–170.
- Zhivotovsky,B., Wadw,D., Gahm,A., Orrenius,S. and Nicotera,P. (1994) Formation of 50 kbp chromatin fragments in isolated liver nuclei is mediated by protease and endonuclease activation. *FEBS Lett.*, **351**, 150–154.

Received on May 2, 2000; accepted on October 12, 2000
